# Supplementary material
Source: MDPI journal article supplement (https://www.mdpi.com/2227-7390/11/6/1336)
Supplement: s1 [file s1]

Archive with 1 entries (1 files):
- mathematics-2193254-supplementary.pdf
